# Supplementary material for: Electrochemically derived functionalized graphene for bulk production of hydrogen peroxide
Source: publisher site journal article supplement (doi:10.3762/bjnano.11.34), 2020-03-09
Supplement: Additional file 1 [file 2190-4286-11-34-S1.pdf]

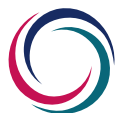

## Supporting Information

for

### **Electrochemically derived functionalized graphene for bulk production of hydrogen peroxide**

Munaiah Yeddala, Pallavi Thakur, Anugraha A and Tharangattu N. Narayanan

*Beilstein J. Nanotechnol.* **2020**, *11*, 432–442. [doi:10.3762/bjnano.11.34](https://doi.org/10.3762/bjnano.11.34)

### **Additional experimental results and analysis**

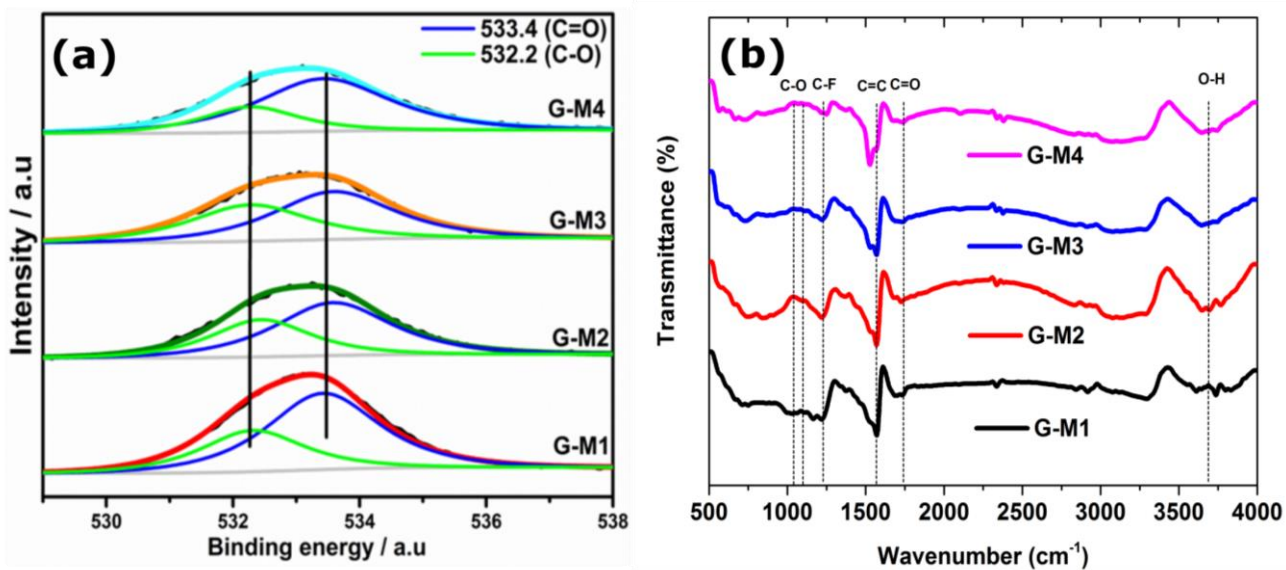

**Figure S1:** (a) Deconvoluted high resolution XP spectra of O 1s. (b) FTIR spectra of EEGs.

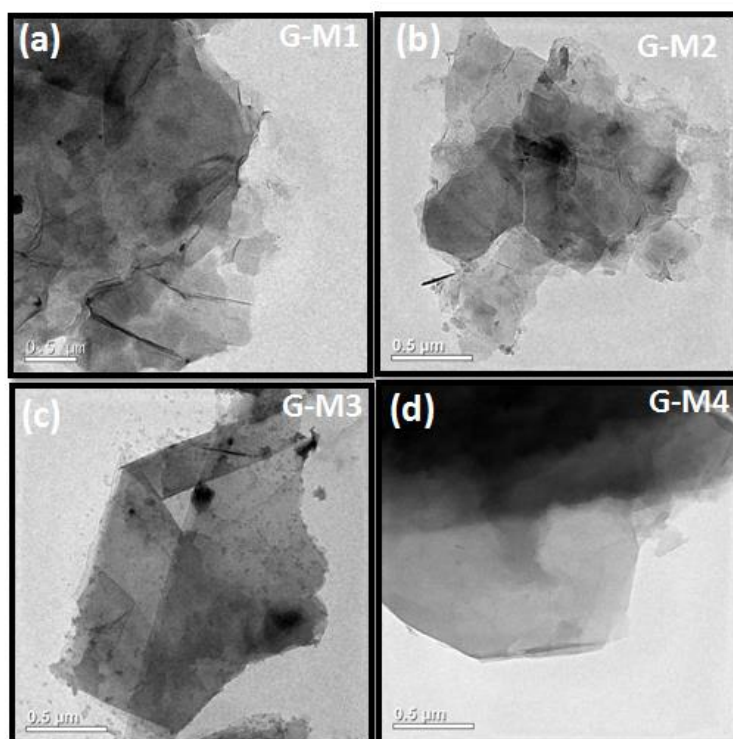

**Figure S2:** TEM images of G-M1, G-M2, G-M3, and G-M4 showing the electron transmission variation from M1 to M4.

**Table S1:** Elemental composition of carbonyl and alcoholic oxygen in total oxygen functional groups calculated from Figure S2(a).

|      | % of C=O | % of C-O |
|------|----------|----------|
| G-M1 | 67.8     | 32.2     |
| G-M2 | 62.0     | 38.0     |
| G-M3 | 56.2     | 43.8     |
| G-M4 | 72.8     | 27.2     |

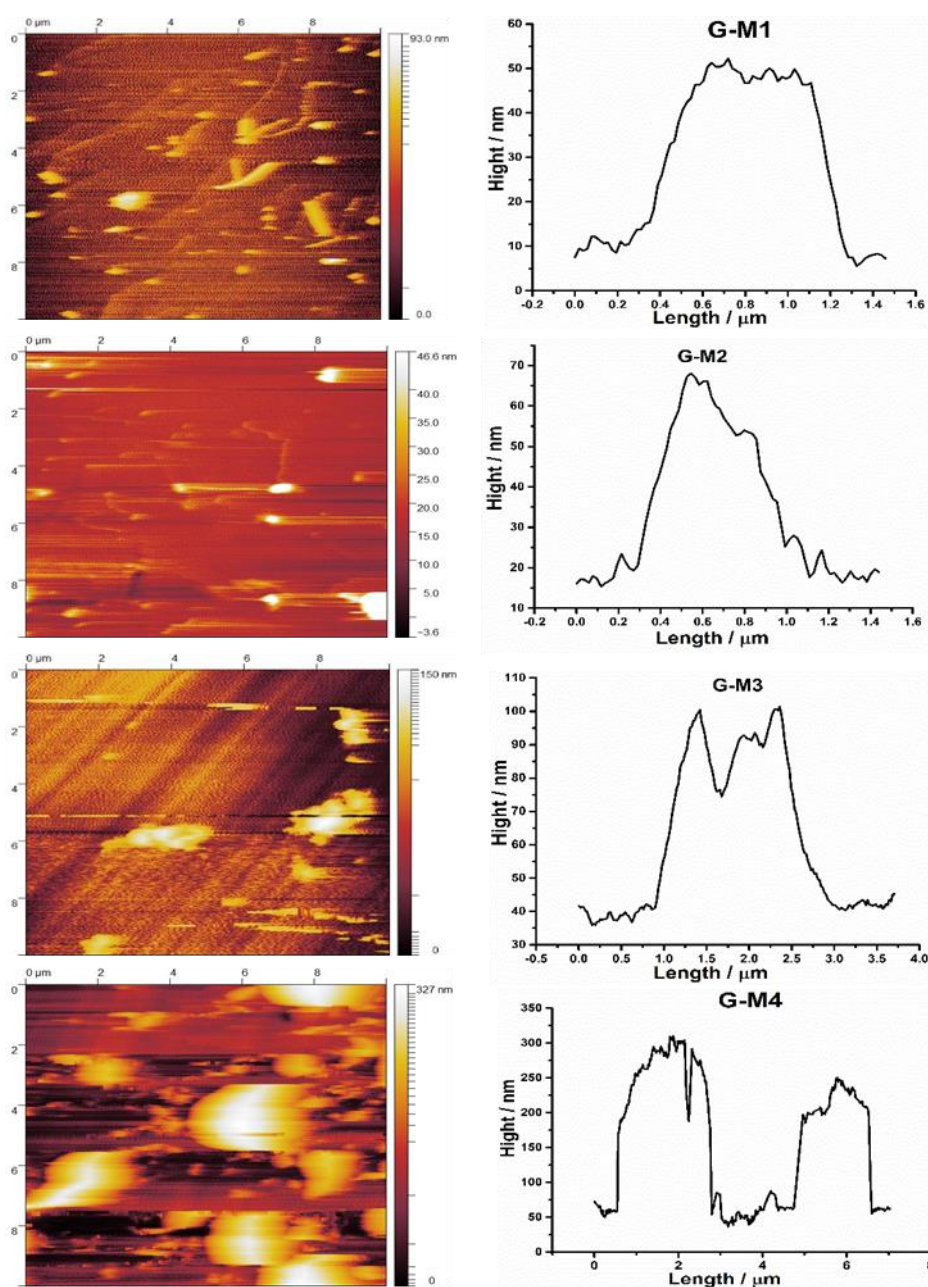

**Figure S3:** AFM images of EEGs and their corresponding line profiles showing the thickness variations are shown.

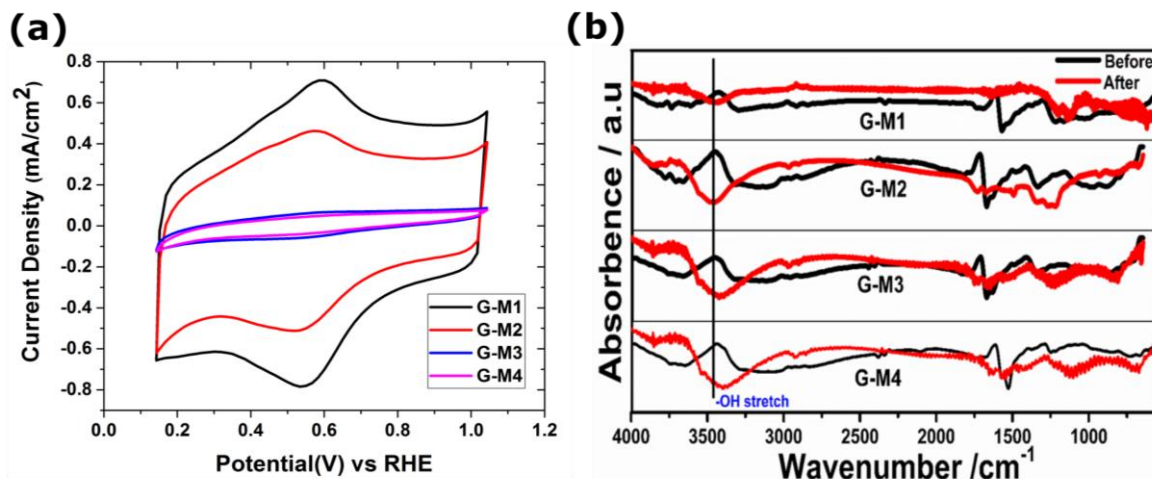

**Figure S4:** (a): The CVs of different EEGs in (a) acidic (0.5 M H<sub>2</sub>SO<sub>4</sub>) medium at 5 mV/s scan rate. (b) FTIR spectra of EEGs before (black) and after (red) 3 h of chronoamperometry in 0.5 M H<sub>2</sub>SO<sub>4</sub> solution. The intensity of all the spectra are normalized for comparison.

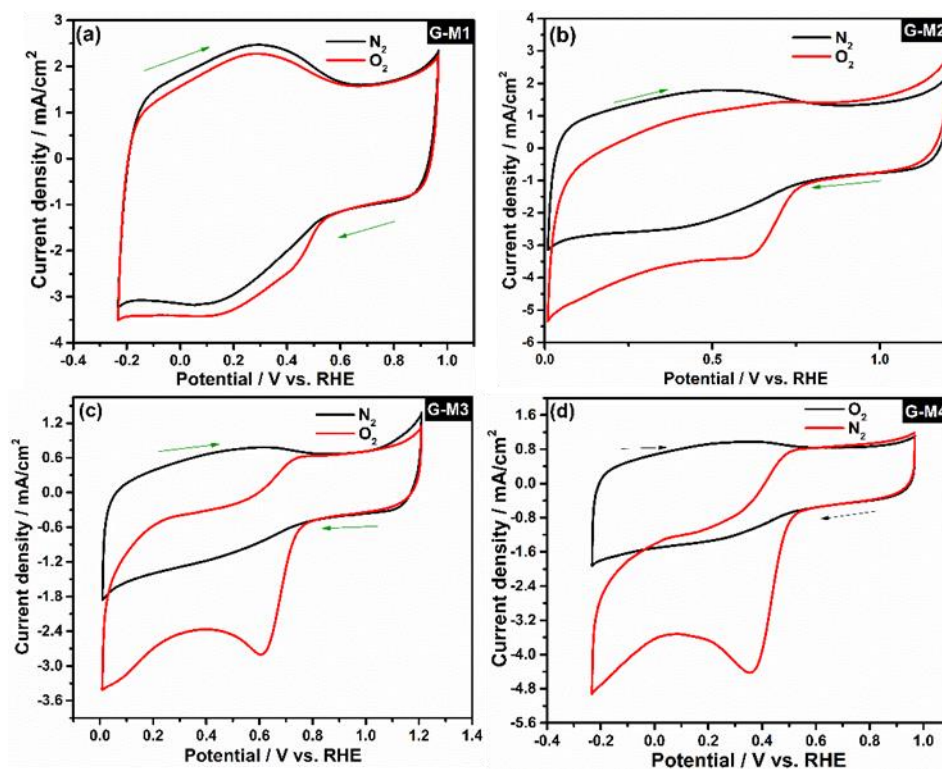

**Figure S5:** CVs of ORR in N<sub>2</sub> and O<sub>2</sub> saturated 0.1 M KOH electrolyte at 10 mV/s scan rate. The current density values are calculated with respect to ECSA of the materials.

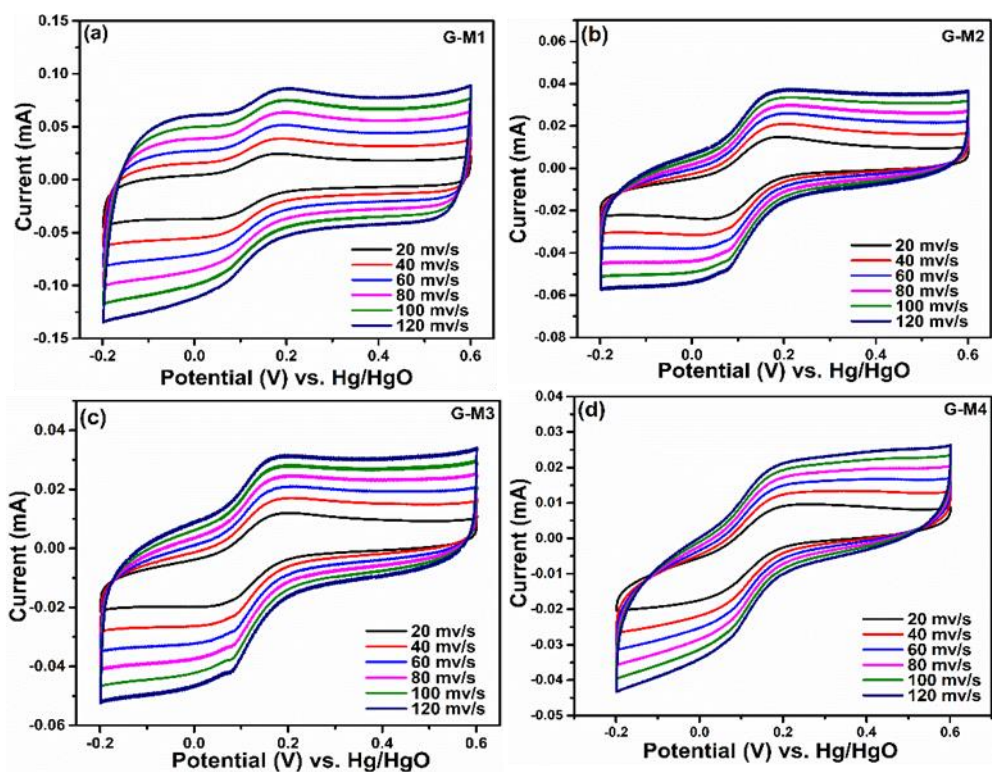

**Figure S6:** Ferri/ Ferro redox responses of EEG modified GCEs at different scan rates.

Randles-Sevcik equation is used to calculate the electrochemical surface area:

$$I_p = (2.69 \times 10^5) n^{3/2} A D^{1/2} v^{1/2} C$$

$$I_p = m v^{1/2}$$

Where  $i_p$  = peak current (A)

$D$  = Diffusion coefficient in  $\text{cm}^2/\text{s}$  of potassium ferricyanide solution

$v^{1/2}$  = Sqrt. Of scan rate (V/s)

$C$  = concentration of electrolyte (5 mM)

$A$  = ECSA

$m$  = Slope

ECSA

M1 =  $0.0837 \text{ cm}^2$  for 0.05 mg loading

M2 = 0.0297 cm<sup>2</sup> for 0.05 mg loading

M3 = 0.0264 cm<sup>2</sup> for 0.05 mg loading

M4 = 0.0162 cm<sup>2</sup> for 0.05 mg loading

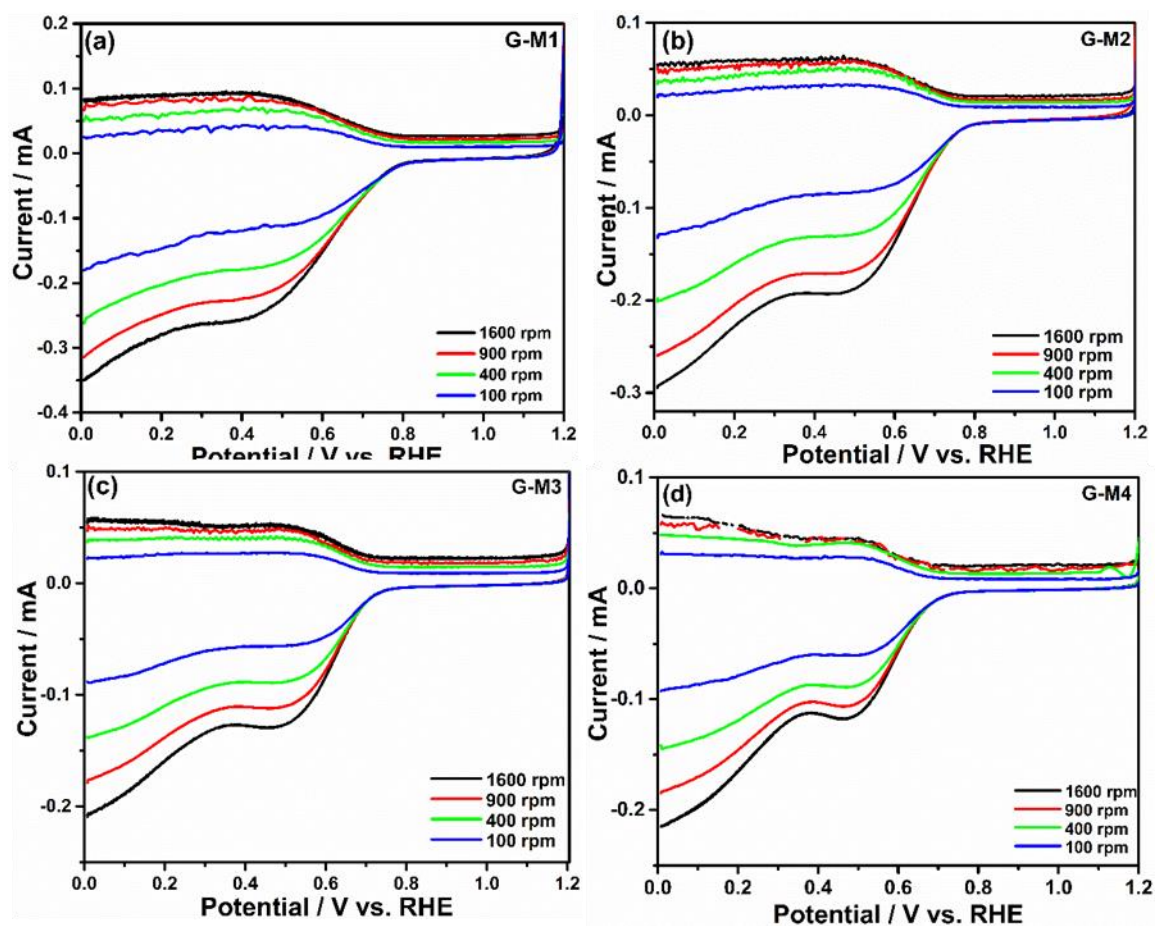

**Figure S7:** LSVs of ORR on Rotating disk modified with EEGs at 10 mV/s and oxidation of H<sub>2</sub>O<sub>2</sub> at Pt ring electrode at 1.5 V vs. RHE at different rotation rates.

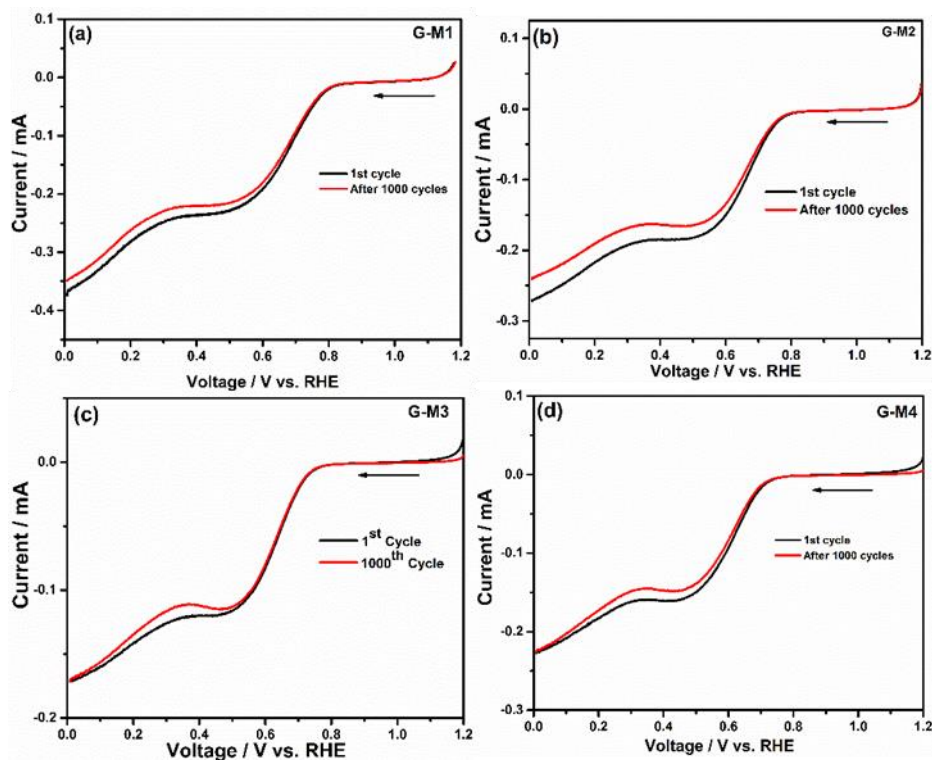

**Figure S8:** LSVs of ORR in 0.1 M KOH electrolyte at 100 mV/s scan rate and 1600 rpm rotation before and after 1000 repeated LSV. The samples show no considerable change either in onset potential or in current. No shift can be seen in half wave potential too.

### **Calculation of number electrons transferred and % of H<sub>2</sub>O<sub>2</sub> produced**

Some of the critical electrochemical parameters such as the number of electrons transferred per oxygen molecule during the reduction can be calculated from either from Koutecky-levich (K-L-Plots) equation or from RRDE electrochemical data. Since RRDE electrochemical data is more reliable than that of K-L plots, we employed RRDE data to calculate the number of electron and % of H<sub>2</sub>O<sub>2</sub> produced during the ORR [3].

Ring and disk current in RRDE method employed as follows (equation 1) to determine the number of electrons transferred during ORR

$$n = \frac{4I_D}{I_D + \frac{I_R}{N}} \text{-----(1)}$$

Where  $I_D$  and  $I_R$  are disk and ring currents at a given potential respectively and  $N$  is the collection efficiency of the ring which is 0.4 determined using  $\text{Fe}^{2+}/\text{Fe}^{3+}$  standard redox couple.

The % of  $\text{H}_2\text{O}_2$  formed at GC disk and oxidized at the ring is calculated using the following equation.

$$\text{H}_2\text{O}_2 \text{ (\%)} = 200 \times \frac{\frac{I_R}{N}}{\frac{I_R}{N} + I_D} \text{----- (2)}$$

Where  $I_R$  and  $I_D$  are ring and disk currents and  $N$  is the collection efficiency of the ring (0.39).

### **Quantification of $\text{H}_2\text{O}_2$**

1 mM  $\text{Ce}(\text{SO}_4)_2$  solution was prepared by dissolving 33.2 mg of salt in 100 mL of 0.5 M  $\text{H}_2\text{SO}_4$  solution [1]. UV spectrum of 1 mM  $\text{Ce}(\text{SO}_4)_2$  solution was recorded which shows a sharp peak at 325 nm (Figure S9a). 3  $\mu\text{L}$  of 1%  $\text{H}_2\text{O}_2$  (30%  $\text{H}_2\text{O}_2$  was diluted to 1% by the addition of water) was added to 25 mL of the above solution to convert  $\text{Ce}^{4+}$  into  $\text{Ce}^{3+}$  which show a different peak in UV spectra [2]. Consecutive addition of  $\text{H}_2\text{O}_2$  increase the concentration of  $\text{Ce}^{3+}$  in the solution which can be seen in UV spectra. UV spectrum of  $\text{Ce}^{3+}$  shows a series of Peaks between 200–275 nm and the peak at 254 nm is independent of the concentration of the  $\text{SO}_4^{2-}$  ions in the solvent [2]. The area under the curve is directly proportional to the concentration of  $\text{Ce}^{3+}$  ion. The peak at 254 nm is considered for the construction of the calibration curve and the calibration curve is shown in the figure S9b.

The quantification of  $\text{H}_2\text{O}_2$  generated during chronoamperometry was determined from UV spectra of  $\text{Ce}(\text{SO}_4)_2$  (Figure S9c) after addition of 3 mL of 0.1 M KOH (after 3 h of chronoamperometry at 0.358 V to 25 ml of 1 mM  $\text{Ce}(\text{SO}_4)_2$  solution. The area



under the peak at 254 nm is calculated to determine the concentration of  $\text{H}_2\text{O}_2$  from calibration curve.

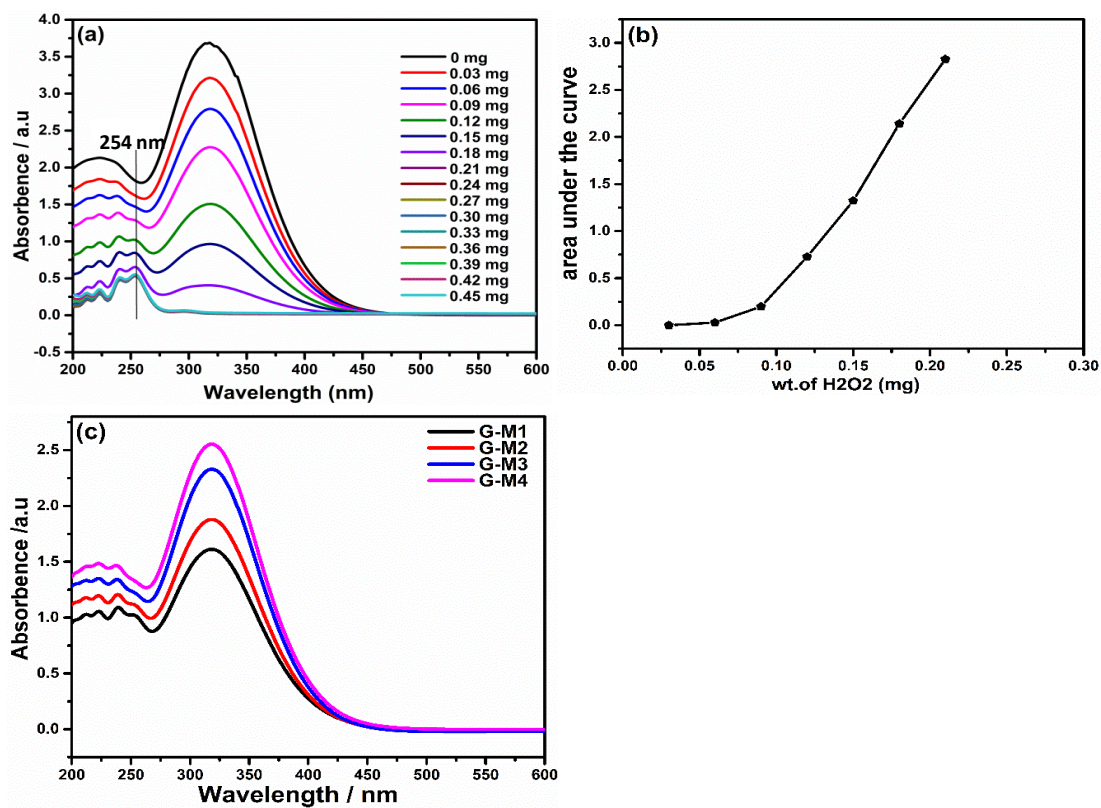

**Figure S9:** (a) Ultraviolet absorption spectrum  $\text{Ce}(\text{SO}_4)_2$  solution having different concentrations of  $\text{H}_2\text{O}_2$ . (b) Calibration curve derived from Figure S9a. (c) Ultraviolet absorption spectrum  $\text{Ce}(\text{SO}_4)_2$  solution (25 mL) having 0.1 KOH solution (3ml) after 3 h of chronoamperometry at  $-0.358$  V having EEGs modified carbon paper as working electrode.

## References

1. Lu, Z.; Chen, G.; Siahrostami, S.; Chen, Z.; Liu, K.; Xie, J.; Liao, L.; Wu, T.; Lin, D.; Liu, Y.; Jaramillo, T. F.; Nørskov, J. K.; Cui, Y. High-efficiency oxygen reduction to hydrogen peroxide catalysed by oxidized carbon materials. *Nature Catalysis* **2018**, *1*, 156-162.
2. Greenhaus, H. L.; Feibush, A. M.; Gordon, L. Ultraviolet Spectrophotometric Determination of Cerium(III). *Analytical Chemistry* **1957**, *29*, 1531-1534.
3. Zhou, R.; Zheng, Y.; Jaroniec, M.; Qiao, S.-Z. Determination of the Electron Transfer Number for the Oxygen Reduction Reaction: From Theory to Experiment. *ACS Catalysis* **2016**, *6*, 4720-4728.
